# Supplementary material for: Genome-wide identification and expression analysis of CASPL gene family in Zea mays (L.)
Source: Front Plant Sci. 2024 Oct 28;15:1477383. doi: 10.3389/fpls.2024.1477383 (PMC11550983; doi:10.3389/fpls.2024.1477383)
Supplement: Supplementary file 1 [file Table1.xlsx]

## Sheet: Supplemental Table 1
Supplemental Table 1. Physicochemical properties of CASPs family gene in maize
Gene Number	Gene Number	Number of Amino Acid	Molecular Weight	Theoretical pI	Instability Index	Aliphatic Index	Grand Average of Hydropathicity
Zm00001d028063	ZmCASPL1	108	11375.2	8.07	60.02	84.07	0.281
Zm00001d028062	ZmCASPL2	181	19043.6	6.78	41.58	113.2	0.891
Zm00001d028160	ZmCASPL3	234	24716.1	9.33	39.69	97.26	0.651
Zm00001d028799	ZmCASPL4	122	12371	6.1	21.37	94.51	0.243
Zm00001d031047	ZmCASPL5	205	21171.8	11.01	41.02	96.44	0.441
Zm00001d034189	ZmCASPL6	159	16658.6	5.98	35.83	106.1	1.053
Zm00001d001779	ZmCASPL7	228	23989.3	9.55	29.54	114.47	0.777
Zm00001d003418	ZmCASPL8	193	20594.3	8.56	28.88	117.41	0.929
Zm00001d004198	ZmCASPL9	213	22311.7	7.55	37.97	97.79	0.463
Zm00001d005158	ZmCASPL10	203	21175	9.99	50.83	118.28	0.738
Zm00001d007379	ZmCASPL11	189	19731.1	6.09	45.41	120.21	0.699
Zm00001d007451	ZmCASPL12	187	19355.7	4.75	18.68	135.67	0.874
Zm00001d040807	ZmCASPL13	220	22725.7	9.43	34.31	104.68	0.715
Zm00001d041567	ZmCASPL14	196	19679.7	10.06	32.66	91.12	0.468
Zm00001d042872	ZmCASPL15	154	16266.1	6.08	45.48	102.86	0.878
Zm00001d043984	ZmCASPL16	305	30861.2	5.29	93.9	52	-0.566
Zm00001d044093	ZmCASPL17	390	40609.8	9.51	74.32	69.97	-0.348
Zm00001d048727	ZmCASPL18	209	21582.6	6.93	49.07	82.34	0.325
Zm00001d048728	ZmCASPL19	201	20488.5	8.46	40.27	86.62	0.314
Zm00001d048729	ZmCASPL20	203	20426	9.03	34.03	76.16	0.137
Zm00001d048761	ZmCASPL21	207	21414.5	8.87	28.27	91.16	0.151
Zm00001d049285	ZmCASPL22	183	18911.7	4.61	31.11	103.88	0.562
Zm00001d049865	ZmCASPL23	172	18332.2	9.37	19.14	96.69	0.574
Zm00001d052757	ZmCASPL24	222	22995.2	9.76	35.34	113.47	0.842
Zm00001d053996	ZmCASPL25	347	36612.7	10.32	63.97	71.96	-0.218
Zm00001d012988	ZmCASPL26	184	19332.2	5.58	41.03	96.2	0.404
Zm00001d014299	ZmCASPL27	109	11578.7	6.5	45.6	123.76	1.03
Zm00001d015184	ZmCASPL28	302	32259.7	10.41	61.92	74.57	-0.204
Zm00001d015463	ZmCASPL29	182	18997.6	9.41	45.67	102.69	0.712
Zm00001d016363	ZmCASPL30	182	19331.2	6.4	31.04	92.36	0.308
Zm00001d016883	ZmCASPL31	176	18797.9	7.81	36.08	118.58	0.597
Zm00001d018029	ZmCASPL32	202	21118.9	9.93	29.9	122.33	0.856
Zm00001d036700	ZmCASPL33	187	19438.9	9.5	37.84	110.37	0.641
Zm00001d038004	ZmCASPL34	189	20349.4	6.1	30.21	97.25	0.309
Zm00001d019457	ZmCASPL35	196	20672.6	10.17	50.13	123.47	0.728
Zm00001d019915	ZmCASPL36	375	38141.5	9.27	50.37	84.37	0.293
Zm00001d019917	ZmCASPL37	105	11349.4	6.5	32.33	116	0.888
Zm00001d022574	ZmCASPL38	228	23735.2	9.69	46.06	84.69	0.238
Zm00001d010038	ZmCASPL39	163	16995.1	7.74	19.14	119.2	1.02
Zm00001d010053	ZmCASPL40	154	16317.3	8.69	38.93	111.69	0.994
Zm00001d011455	ZmCASPL41	348	36361.1	9.68	69.22	80.66	-0.164
Zm00001d044816	ZmCASPL42	186	19865.6	9.87	23.96	124.89	0.782
Zm00001d046916	ZmCASPL43	185	19270.7	9.47	35.7	111.03	0.636
Zm00001d047702	ZmCASPL44	245	25620	6.58	22.74	85.14	0.18
Zm00001d023936	ZmCASPL45	186	19218.9	9.24	27.39	115.81	0.936
Zm00001d025126	ZmCASPL46	209	21934.3	8.26	34.52	99.67	0.478
Zm00001d025613	ZmCASPL47	192	20465.1	9.22	29.55	116.93	0.895
